# Supplementary material
Source: ML conference proceedings conference paper supplement (https://proceedings.neurips.cc/paper_files/paper/2023/hash/1d83ad88759cef8192451543e5d59bf6-Abstract.html)
Supplement: Supplementary file 1 [file 1d83ad88759cef8192451543e5d59bf6-Supplemental-Conference.pdf]

---

# Polyhedron Attention Module: Learning Adaptive-order Interactions

---

Anonymous Author(s)

Affiliation

Address

email

1 **Appendixes**

2 **Contents**

|    |                                                                                                |          |
|----|------------------------------------------------------------------------------------------------|----------|
| 3  | <b>A Deriving Eq. 2.</b>                                                                       | <b>2</b> |
| 4  | <b>B The hyperplane set generated by the oblique tree is a superset of that created by the</b> |          |
| 5  | <b>ReLU-activated plain DNN</b>                                                                | <b>3</b> |
| 6  | <b>C Proof of Theorem 1</b>                                                                    | <b>4</b> |
| 7  | <b>D Proof of Theorem 2</b>                                                                    | <b>5</b> |
| 8  | <b>E Proof of Theorem 3</b>                                                                    | <b>6</b> |
| 9  | <b>F Proof of Theorem 4</b>                                                                    | <b>7</b> |
| 10 | <b>G Implementation Detail</b>                                                                 | <b>8</b> |

## 11 A Deriving Eq. 2.

12 We consider a  $L$ -layer ( $L \geq 2$ ) ReLU activated plain DNN module  $f : \mathbb{R}^{n_0} \rightarrow \mathbb{R}^{n_L}$  with input  
 13  $\mathbf{x} \in \mathbb{R}^p$ . Let  $W^\ell \in \mathbb{R}^{n_\ell \times n_{\ell-1}}$  and  $b^\ell \in \mathbb{R}^{n_\ell}$  be the weights and offset vectors of layer  $\ell$ , for  
 14  $\ell = \{1, \dots, L\}$  and  $n_0 = p$ . Let  $f^0(\mathbf{x}) = \mathbf{x}$ . For  $\ell \in \{1, \dots, L\}$ , we define recursively the pre- and  
 15 post-activation output of every layer as

$$\begin{aligned} g^\ell(\mathbf{x}) &= W^\ell f^{\ell-1}(\mathbf{x}) + b^\ell, \\ f^\ell(\mathbf{x}) &= \text{ReLU}(g^\ell(\mathbf{x})), \end{aligned}$$

16 where ReLU activation function is denoted by  $\text{ReLU}(t) = \max(0, t)$ .

17 The first  $L - 1$  layers of the ReLU-activated DNN module has  $\sum_{\ell=1}^{L-1} n_\ell$  activation functions, and  
 18 thus have  $2^{\sum_{\ell=1}^{L-1} n_\ell}$  possible activation states. Let  $A \in \{1, -1\}^{\sum_{\ell=1}^{L-1} n_\ell}$  be an activation state (1/-1  
 19 means activate/inactive) of all but the last layer's ReLU in the DNN module, and  $A_i^\ell \in \{-1, 1\}$  be the  
 20 activation state of the  $i^{\text{th}}$  ReLU activation function in the  $\ell^{\text{th}}$  layer of the DNN module. Conditioned  
 21 on  $\{A^1, \dots, A^{\ell-1}\}$ ,  $g^\ell(\mathbf{x})$  can be rewritten as a linear function.

$$\begin{aligned} &g^\ell(\mathbf{x})|_{\{A^1, \dots, A^{\ell-1}\}} \\ &= \begin{cases} W_\emptyset^{(1)} \mathbf{x} + b_\emptyset^{(1)} \\ = W^1 \mathbf{x} + b^1, & \ell = 1, \\ W_{\{A^1, \dots, A^{\ell-1}\}}^{(\ell)} \mathbf{x} + b_{\{A^1, \dots, A^{\ell-1}\}}^{(\ell)} \\ = W^\ell \Sigma^{A^{\ell-1}} W_{\{A^1, \dots, A^{\ell-2}\}}^{(\ell-1)} \mathbf{x} + W^\ell \Sigma^{A^{\ell-1}} b_{\{A^1, \dots, A^{\ell-2}\}}^{(\ell-1)} + b^\ell, & \ell > 1, \end{cases} \end{aligned} \quad (1)$$

22 where  $W_{\{A^1, \dots, A^{\ell-1}\}}^{(\ell)} \in \mathbb{R}^{n_\ell \times n_0}$ ,  $b_{\{A^1, \dots, A^{\ell-1}\}}^{(\ell)} \in \mathbb{R}^{n_\ell}$ ,  $\Sigma^{A^\ell}$  is a  $n_\ell \times n_\ell$  matrix with

$$\Sigma_{i,j}^{A^\ell} = \mathbb{1}(i = j \text{ and } A_i^\ell = 1).$$

23 To generate the activation state  $A$ ,  $\mathbf{x}$  should meet all inequalities  $A_i^\ell g_i^\ell(\mathbf{x})|_{\{A^1, \dots, A^{\ell-1}\}} \geq 0$  for  
 24  $\forall \ell \in \{1, 2, \dots, L-1\}$  and  $\forall i \in \{1, 2, \dots, n_\ell\}$ , where  $g_i^\ell(\mathbf{x})|_{\{A^1, \dots, A^{\ell-1}\}}$  is the  $i^{\text{th}}$  result of  
 25  $g^\ell(\mathbf{x})|_{\{A^1, \dots, A^{\ell-1}\}}$ . It results in a polyhedron  $\Delta_A$ :

$$\Delta_A = \cap_{\ell \in \{1, \dots, L-1\}} \cap_{i \in \{1, \dots, n_\ell\}} \{\mathbf{z} \in \mathbb{R}^p | A_i^\ell g_i^\ell(\mathbf{z})|_{\{A^1, \dots, A^{\ell-1}\}} \geq 0\}. \quad (2)$$

26 Let the set of polyhedron be  $\mathcal{S}_\Delta = \{\Delta_A | A \in \{1, -1\}^{\sum_{\ell=1}^{L-1} n_\ell}\}$ . We have

$$g^L(\mathbf{x}) = \begin{cases} W_{\Delta_1}^{(L)} \mathbf{x} + b_{\Delta_1}^{(L)}, & \mathbf{x} \in \Delta_1, \\ \dots \\ W_{\Delta_{|\mathcal{S}_\Delta|}}^{(L)} \mathbf{x} + b_{\Delta_{|\mathcal{S}_\Delta|}}^{(L)}, & \mathbf{x} \in \Delta_{|\mathcal{S}_\Delta|}. \end{cases} \quad (3)$$

27 Then the  $i^{\text{th}}$  activation function's output in the last layer of the DNN can be expressed as

$$\begin{aligned} \text{ReLU}(g_i^L(\mathbf{x})) &= \sum_{\Delta \in \mathcal{S}_\Delta} \mathbb{1}(\mathbf{x} \in \Delta) \text{ReLU}(W_{\Delta,i}^{(L)} \mathbf{x} + b_{\Delta,i}^{(L)}) \\ &= \sum_{\Delta \in \mathcal{S}_\Delta} \mathbb{1}(\mathbf{x} \in \Delta, W_{\Delta,i}^{(L)} \mathbf{x} + b_{\Delta,i}^{(L)} \geq 0) (W_{\Delta,i}^{(L)} \mathbf{x} + b_{\Delta,i}^{(L)}) + \sum_{\Delta \in \mathcal{S}_\Delta} \mathbb{1}(\mathbf{x} \in \Delta, W_{\Delta,i}^{(L)} \mathbf{x} + b_{\Delta,i}^{(L)} < 0) \cdot 0 \\ &= \sum_{\Delta \in \mathcal{S}_\Delta} \mathbb{1}(\mathbf{x} \in \Delta, W_{\Delta,i}^{(L)} \mathbf{x} + b_{\Delta,i}^{(L)} \geq 0) \text{dist}(\mathbf{x}, H_{\Delta,i,L}) \|W_{\Delta,i}^{(L)}\| \\ &\quad + \sum_{\Delta \in \mathcal{S}_\Delta} \mathbb{1}(\mathbf{x} \in \Delta, W_{\Delta,i}^{(L)} \mathbf{x} + b_{\Delta,i}^{(L)} < 0) \text{dist}(\mathbf{x}, H_{\Delta,i,L}) \cdot 0, \end{aligned}$$

28 where  $g_i^L(\mathbf{x})$  is the  $i^{\text{th}}$  element of  $g^L(\mathbf{x})$ 's output,  $W_{\Delta,i}^{(L)}$  is the  $i^{\text{th}}$  row of  $W_\Delta^{(L)}$ ,  $b_{\Delta,i}^{(L)}$  is the  $i^{\text{th}}$   
 29 element of  $b_\Delta^{(L)}$ , and  $\text{dist}(\mathbf{x}, H_{\Delta,i,L})$  is the distance from  $\mathbf{x}$  to  $W_{\Delta,i}^{(L)} \mathbf{x} + b_{\Delta,i}^{(L)} = 0$ . Let  $\Delta_1 = \{\mathbf{x} \in$   
 30  $\Delta, W_{\Delta,i}^{(L)} \mathbf{x} + b_{\Delta,i}^{(L)} \geq 0\}$  and  $\Delta_2 = \{\mathbf{x} \in \Delta, W_{\Delta,i}^{(L)} \mathbf{x} + b_{\Delta,i}^{(L)} < 0\}$ . Eq. 2 in the main text can be  
 31 obtained by rewriting  $\sum_{\Delta \in \mathcal{S}_\Delta}$  as  $\sum_{\Delta}$ .

## 32 B The hyperplane set generated by the oblique tree is a superset of that 33 created by the ReLU-activated plain DNN

34 An oblique tree is a binary tree where each node splits the space by a hyperplane rather than by  
35 thresholding a single feature. The tree starts with the root of the full input space  $\mathcal{S}$ , and by recursively  
36 splitting  $\mathcal{S}$ , the tree grows deeper. For a  $D$ -depth ( $D \geq 3$ ) binary tree, there are  $2^{D-1} - 1$  internal  
37 nodes and  $2^{D-1}$  leaf nodes. As shown in Fig. 3, each internal and leaf node maintains a sub-space  
38 representing a polyhedron  $\Delta$  in  $\mathcal{S}$ , and each layer of the tree corresponds to a partition of the input  
39 space into polyhedrons. Denote the polyhedron defined in node  $n$  by  $\Delta_n$ , and the left and right  
40 child nodes of  $n$  by  $n_L$  and  $n_R$ . We perform soft partition to split each  $\Delta_n$  into  $\Delta_{n_L}$  and  $\Delta_{n_R}$  with  
41 an overlapping buffer. Let the splitting hyperplane be  $\{\mathbf{x} \in \mathbb{R}^p : W_n \mathbf{x} + b_n = 0\}$ . Then the two  
42 sub-spaces  $\Delta_{n_L}$  and  $\Delta_{n_R}$  are defined as follows:

$$\begin{aligned}\Delta_{n_L} &= \{\mathbf{x} \in \Delta_n \mid W_n \mathbf{x} + b_n \geq -U_n\}, \\ \Delta_{n_R} &= \{\mathbf{x} \in \Delta_n \mid -W_n \mathbf{x} - b_n \geq -U_n\},\end{aligned}\tag{4}$$

43 where  $U_n$  indicates the width of the overlapping buffer.

44 According to the Appendix A, a ReLU-activated plain DNN  $g^L(\mathbf{x})$  can be rewritten as a piece-wise  
45 linear function dividing the input space into a set of polyhedrons  $\mathcal{S}_\Delta$ . In this section, we are going  
46 to prove that for any  $\mathcal{S}_\Delta$  generated by the ReLU-activated plain DNN, there exists an oblique tree  
47 dividing the input space into the same polyhedron set.

48 **Proof: Statement:** For any  $\mathcal{S}_\Delta$  generated by the ReLU-activated plain DNN, there exists an oblique  
49 tree dividing the input space into the same polyhedron set.

50 **Base Case:** Let  $A^\ell = \{1, -1\}^{n_\ell}$  be the activation state (1/ -1 means activate/ inactive) of the  $\ell^{th}$   
51 layer of the DNN. To generate the activation state  $A^1$ , the input of the ReLU-activated plain DNN  $\mathbf{x}$   
52 belongs to the polyhedron

$$\Delta_{\{A^1\}} = \cap_{i \in \{1, \dots, n_1\}} \{\mathbf{z} \in \mathbb{R}^p \mid A_i^1 g_i^1(\mathbf{z})|_{\emptyset} \geq 0\},$$

53 where  $g_i^1(\mathbf{x})|_{\emptyset}$  is defined in Eq. 1. We can build an oblique tree  $T^1$  to generate  $\Delta_{\{A^1\}}$ . In  
54 particular, the depth of the oblique tree is  $n_1 + 1$ . Let  $\mathcal{N}_d$  be the oblique tree's node set with depth  
55  $d$  ( $d \in \{1, 2, \dots, n_1\}$ ). For each node  $n \in \mathcal{N}_d$ , we have  $W_n = W_d^1$ ,  $b_n = b_d^1$ , and  $U_n = 0$  (see  
56 definitions in Eq. 4). According to Eq. 6 in the main text, for each  $T^1$ 's leaf node  $n$ , the oblique tree  
57 generates polyhedrons following

$$\Delta_n = [\cap_{n' \in \mathcal{P}_n^L} \{\mathbf{z} \in \mathbb{R}^p \mid W_{n'} \mathbf{z} + b_{n'} \geq 0\}] \cap [\cap_{n' \in \mathcal{P}_n^R} \{\mathbf{z} \in \mathbb{R}^p \mid (-W_{n'}) \mathbf{z} + (-b_{n'}) \geq 0\}].$$

58 For any possible  $A^1$ , we can find a leaf node  $n$  from  $\mathcal{N}_{n_1+1}$  with  $\Delta_n = \Delta_{\{A^1\}}$ . Then for each leaf  
59 node  $n$ , we can also find a activation state with  $\Delta_{\{A^1\}} = \Delta_n$ . Therefore, we have  $\{\Delta_{\{A^1\}} \mid A^{\ell'} \in$   
60  $\{1, -1\}^{n_{\ell'}}, \ell' \in \{1\}\} = \{\Delta_n \mid n \text{ is } T^1\text{'s leaf node}\}$ .

61 **Inductive Step:** To generate activation states  $\{A^1, \dots, A^{\ell-1}\}$  ( $\ell > 1$ ), according to Eq. 2, the input  
62 of the DNN model belongs to

$$\Delta_{\{A^1, \dots, A^{\ell-1}\}} = \cap_{\ell' \in \{1, \dots, \ell-1\}} \cap_{i \in \{1, \dots, n_{\ell'}\}} \{\mathbf{z} \in \mathbb{R}^p \mid A_i^{\ell'} g_i^{\ell'}(\mathbf{z})|_{\{A^1, \dots, A^{\ell-1}\}} \geq 0\}.$$

63 If there exists a  $(\sum_{\ell'=1}^{\ell-1} n_{\ell'} + 1)$ -depth oblique tree  $T^{\ell-1}$  splitting the input space into a set of polyhe-  
64 drons with  $\{\Delta_{\{A^1, \dots, A^{\ell-1}\}} \mid A^{\ell'} \in \{1, -1\}^{n_{\ell'}}, \ell' \in \{1, 2, \dots, \ell-1\}\} = \{\Delta_n \mid n \text{ is } T^{\ell-1}\text{'s leaf node}\}$ ,  
65 by adding nodes to  $T^{\ell-1}$ , we could build a  $(\sum_{\ell'=1}^{\ell} n_{\ell'} + 1)$ -depth oblique tree  $T^\ell$  with  
66  $\{\Delta_{\{A^1, \dots, A^\ell\}} \mid A^{\ell'} \in \{1, -1\}^{n_{\ell'}}, \ell' \in \{1, 2, \dots, \ell\}\} = \{\Delta_n \mid n \text{ is } T^\ell\text{'s leaf node}\}$ . In the following  
67 part, we exhibit the pipeline to build  $T^\ell$ .

68 For each  $T^{\ell-1}$ 's leaf node  $n$  with  $\Delta_n = \Delta_{\{A^1, \dots, A^{\ell-1}\}}$ , We build an oblique sub-tree rooted at  $n$  to  
69 generate

$$\Delta_{\{A^1, \dots, A^\ell\}} = \Delta_{\{A^1, \dots, A^{\ell-1}\}} \cap [\cap_{i \in \{1, \dots, n_\ell\}} \{\mathbf{z} \in \mathbb{R}^p \mid A_i^\ell g_i^\ell(\mathbf{z})|_{\{A^1, \dots, A^{\ell-1}\}} \geq 0\}].$$

70 In particular, the depth of the oblique sub-tree is  $n_\ell + 1$ . Let  $\mathcal{N}_d$  be the oblique sub-tree's node set  
71 with depth  $d$ . For each node  $n \in \mathcal{N}_d$ , we have  $W_n = W_{\{A^1, \dots, A^{\ell-1}\}, d}^{(\ell)}$ ,  $b_n = b_{\{A^1, \dots, A^{\ell-1}\}, d}^{(\ell)}$ , and

72  $U_n = 0$ . After adding sub-trees to each of  $T^{\ell-1}$ 's leaf nodes to form  $T^\ell$ , for any activation state  
 73  $\{A^1, \dots, A^\ell\}$ , we can find a leaf node  $n \in \mathcal{N}_{\sum_{l'=1}^L n_{l'}+1}$  from  $T^\ell$  with  $\Delta_n = \Delta_{\{A^1, \dots, A^\ell\}}$ .

74 **Conclusion:** According to the base case and the inductive step, for any ReLU-activated plain DNN's  
 75  $\mathcal{S}_\Delta = \{\Delta_{\{A^1, \dots, A^{L-1}\}} | A^\ell \in \{1, -1\}^{n_\ell}, \ell \in \{1, 2, \dots, L-1\}\}$ , we can build an oblique tree  $T^{L-1}$   
 76 with  $\mathcal{S}_\Delta = \{\Delta_n | n \text{ is } T^{L-1} \text{'s leaf nodes}\}$ .  $\square$

## 77 C Proof of Theorem 1

78 If all value functions  $V$  belong to a function set that is closed under linear transformations, then the  
 79 function learned by PAM  $f_{PAM}$  can be equivalently written as

$$f_{PAM}(\mathbf{x}) = V(\mathbf{x}, \theta_G) + \sum_{n \in \mathcal{S}_\Delta^-} a_n(\mathbf{x}) V(\mathbf{x}, \theta_n) \quad (5)$$

80 where the polyhedron set  $\mathcal{S}_\Delta^-$  contains half of the polyhedrons (e.g., the right child nodes or the left  
 81 child nodes) in  $\mathcal{S}_\Delta$  and

$$a_n(\mathbf{x}) = \prod_{i \in \mathcal{P}_n^l} \max(\min(W_i \mathbf{x} + b_i + U_i, 2U_i), 0) \prod_{i \in \mathcal{P}_n^r} \max(\min(-W_i \mathbf{x} - b_i + U_i, 2U_i), 0). \quad (6)$$

82 **Proof:** Suppose that both  $V(\mathbf{x}, \theta_G)$  and  $V(\mathbf{x}, \theta_n)$  in Eq. 5 belong to the function set  $\mathcal{V}$ . Then we  
 83 have

$$\begin{aligned} & a_n(\mathbf{x}) V(\mathbf{x}, \theta_n) \\ &= \prod_{i \in \mathcal{P}_n^l} \max(\min(\frac{W_i \mathbf{x} + b_i + U_i}{\|W_i\|}, \frac{2U_i}{\|W_i\|}), 0) \prod_{i \in \mathcal{P}_n^r} \max(\min(\frac{-W_i \mathbf{x} - b_i + U_i}{\|W_i\|}, \frac{2U_i}{\|W_i\|}), 0) \\ & \quad \times [V(\mathbf{x}, \theta_n) \prod_{i \in \mathcal{P}_n^l} \|W_i\| \prod_{i \in \mathcal{P}_n^r} \|W_i\|] \end{aligned}$$

84 Since  $\mathcal{V}$  is a function set closed under linear transformation, there exists a value function  $V(\mathbf{x}, \theta'_n) =$   
 85  $[V(\mathbf{x}, \theta_n) \prod_{i \in \mathcal{P}_n^l} \|W_i\| \prod_{i \in \mathcal{P}_n^r} \|W_i\|]$  with  $V(\mathbf{x}, \theta'_n) \in \mathcal{V}$ . Therefore, removing the 2-norm of  $W_i$   
 86 will not decrease the expression capability of attention.

87 To prove that  $\mathcal{S}_\Delta$  can be replaced with  $\mathcal{S}_\Delta^-$ , with  $\mathcal{S}_\Delta = \cup_{d=2}^D \{\Delta_n | n \in \mathcal{N}_d\}$ , we rewrite the output of  
 88 PAM (Eq. 4 in the main text) to

$$f_{PAM}(\mathbf{x}) = V(\mathbf{x}, \theta_G) + \sum_{d=2}^D \sum_{n \in \mathcal{N}_d} a_n(\mathbf{x}) V(\mathbf{x}, \theta_n).$$

89 Then we start from depth  $D$  to 2 and show that  $\frac{|\mathcal{N}_d|}{2}$  value functions can be removed in each depth  $d$ .  
 90 First, let  $P_n$  and  $S_n$  be the parent and sibling nodes of  $n$ . We have

$$\begin{aligned} & \sum_{n \in \mathcal{N}_D} a_n(\mathbf{x}) V(\mathbf{x}, \theta_n) + \sum_{n \in \mathcal{N}_{D-1}} a_n(\mathbf{x}) V(\mathbf{x}, \theta_n) \\ &= \sum_{n \in \mathcal{N}_D} \mathbb{1}(n \text{ is the left child node}) a_n(\mathbf{x}) V(\mathbf{x}, \theta_n) + \sum_{n \in \mathcal{N}_D} \mathbb{1}(n \text{ is the right child node}) a_n(\mathbf{x}) V(\mathbf{x}, \theta_n) \\ & \quad + \sum_{n \in \mathcal{N}_{D-1}} a_n(\mathbf{x}) V(\mathbf{x}, \theta_n) \\ &= \sum_{n \in \mathcal{N}_D} \mathbb{1}(n \text{ is the left child node}) a_n(\mathbf{x}) (V(\mathbf{x}, \theta_n) - V(\mathbf{x}, \theta_{S_n})) \\ & \quad + \sum_{n \in \mathcal{N}_{D-1}} a_n(\mathbf{x}) (2U_n V(\mathbf{x}, \theta_{n_R}) + V(\mathbf{x}, \theta_n)) \end{aligned} \quad (7)$$

91 Since  $V$  belongs to  $\mathcal{V}$ , a function set closed under linear transformation, we have

$$\begin{aligned} V(\mathbf{x}, \theta'_n) &= V(\mathbf{x}, \theta_n) - V(\mathbf{x}, \theta_{S_n}), & n \in \mathcal{N}_D, \\ V(\mathbf{x}, \theta''_n) &= 2U_n V(\mathbf{x}, \theta_{n_R}) + V(\mathbf{x}, \theta_n), & n \in \mathcal{N}_{D-1}. \end{aligned}$$

92 Therefore,  $\frac{|\mathcal{N}_D|}{2}$  attention scores and value functions can be removed in depth  $D$ . By replacing value  
 93 functions from depth  $D$  to 2 following Eq. 7, the number of value functions is halved in each depth of  
 94 the tree. It means that  $\mathcal{S}_\Delta$  can be replaced by  $\mathcal{S}_\Delta^-$ .  $\square$

## 95 D Proof of Theorem 2

96 For any input  $\mathbf{x}$ , by calculating  $\phi_{\mathcal{I}}(\mathbf{x})$  for each  $\mathcal{I} \subseteq \{1, 2, \dots, p\}$  via Algorithm 1, we have  
 97  $\sum_{\mathcal{I} \subseteq \{1, 2, \dots, p\}} \phi_{\mathcal{I}}(\mathbf{x}) = f_{PAM}(\mathbf{x})$ .

98 **Proof:** We first shows that  $f_{PAM}$  can be written explicitly out as  $g(\mathbf{x})$  according to which polyhe-  
 99 dron(s)  $\mathbf{x}$  belongs to.

100 As shown in Eq. 8, max and min operators in PAM's attentions can be rewritten as the ReLU-activated  
 101 function

$$\max(\mathbf{z}, 0) = \text{ReLU}(\mathbf{z}) \text{ and } \min(\mathbf{z}, 2U_i) = -\text{ReLU}(-\mathbf{z} + 2U_i) + 2U_i, \quad (8)$$

102 the calculation of each PAM's attention score contains 2 ReLU activation functions. Suppose that  
 103 the  $f_{PAM}$  has  $n_a$  ReLU activation functions in total, which results in  $2^{n_a}$  possible activation states.  
 104 Let  $A = \{A_1, \dots, A_{n_a}\} \in \{1, -1\}^{n_a}$  be an activation state (1/ -1 means activate/inactive) of  
 105  $f_{PAM}(\mathbf{x})$ , and  $\mathcal{A}$  be the set containing all possible activation states. Let  $\text{ReLU}(h_i(\mathbf{x}))$  be the  $i^{th}$   
 106 ReLU activation function in  $f_{PAM}(\mathbf{x})$ . We have

$$f_{PAM}(\mathbf{x}) = \sum_{A \in \mathcal{A}} \left[ \prod_{i=1}^{n_a} \mathbb{1}(A_i h_i(\mathbf{x}) \geq 0) \right] g_A(\mathbf{x}), \quad (9)$$

107 where  $g_A(\mathbf{x})$  is a polynomial function differentiable everywhere under the activation state  $A$ . In  
 108 particular, if we have an activation state  $A$ , we can obtain  $g_A(\mathbf{x})$  by replacing the ReLU activations  
 109 in  $f_{PAM}(\mathbf{x})$  with either  $h_i(\mathbf{x})$  or 0 depending on whether the corresponding pre-activation value  
 110  $h_i(\mathbf{x})$  is non-negative or negative, respectively. For the sake of simplicity, we simplify  $g_A(\mathbf{x})$  as  $g(\mathbf{x})$ .  
 111 Given the definition of our attention in Eq. 9 in the main text, the highest polynomial order is  $D - 1$   
 112 in the attention, together with the affine value function, the highest polynomial order of  $g(\mathbf{x})$  is  $D$ .  
 113 Since we have assumed  $f_{PAM}$  has only one output at the beginning of section 4 in the main text,  
 114  $g(\mathbf{x}) : \mathbb{R}^p \rightarrow \mathbb{R}$  is a  $D + 1$  times continuously differentiable function at every point  $\mathbf{a} \in \mathbb{R}^p$ , and  
 115  $g(\mathbf{x})$ 's  $(D + 1)$ -order partial derivatives always equals zero, the  $D$  order Taylor polynomial of  $g(\mathbf{x})$   
 116 at the point  $\mathbf{a}$  is

$$g(\mathbf{x}) = \sum_{|\mathbf{m}| \leq D} \frac{D^{\mathbf{m}} g(\mathbf{a})}{\mathbf{m}!} (\mathbf{x} - \mathbf{a})^{\mathbf{m}} = \sum_{|\mathbf{m}| \leq D} w_{\mathbf{m}} \mathbf{x}^{\mathbf{m}}, \quad (10)$$

117 where  $\mathbf{m} = \{m_1, m_2, \dots, m_p\}$  with  $m_i \in \mathbb{Z}^+$ ,  $|\mathbf{m}| = m_1 + \dots + m_p$ ,  $m! = m_1! \dots m_p!$ ,  $\mathbf{x}^{\mathbf{m}} =$   
 118  $x_1^{m_1} \dots x_p^{m_p}$ ,  $D^{\mathbf{m}} g = \frac{\partial^{|\mathbf{m}|} g}{\partial x_1^{m_1} \dots \partial x_p^{m_p}}$  and  $w_{\mathbf{m}} \in \mathbb{R}$  is the weight for the interaction term  $\mathbf{x}^{\mathbf{m}}$ . Let  
 119  $\mathcal{I} \subseteq \{1, 2, \dots, p\}$  be a set of  $\mathbf{x}$ 's feature indices. The interaction effects among  $\mathbf{x}$ 's elements indexed  
 120 by  $\mathcal{I}$  are defined by

$$\begin{aligned} \phi_{\mathcal{I}}(\mathbf{x}) &= \sum_{|\mathbf{m}| \leq D} \mathbb{1}(\prod_{i \in \mathcal{I}} m_i > 0 \text{ and } \sum_{i \in \{1, 2, \dots, p\} / \mathcal{I}} m_i = 0) w_{\mathbf{m}} x_1^{m_1} \dots x_p^{m_p}, \\ \phi_{\emptyset}(\mathbf{x}) &= g(\mathbf{0}) = w_{\mathbf{m}}|_{|\mathbf{m}|=0}, \end{aligned} \quad (11)$$

121 where  $\phi_{\emptyset}(\mathbf{x})$  is the constant effects. Obviously, we have

$$\sum_{\mathcal{I} \subseteq \{1, 2, \dots, p\}} \phi_{\mathcal{I}}(\mathbf{x}) = g(\mathbf{x}).$$

122 The indicator function in Eq. 11 can be removed by rewriting  $\phi_{\mathcal{I}}(\mathbf{x})$  as

$$\begin{aligned}
\phi_{\mathcal{I}}(\mathbf{x}) &= \sum_{|\mathbf{m}| \leq D} \mathbb{1}(\prod_{i \in \mathcal{I}} m_i > 0) w_{\mathbf{m}}(\mathbf{0}^{-\mathcal{I}} \odot \mathbf{x})^{\mathbf{m}} \\
&= \sum_{|\mathbf{m}| \leq D} w_{\mathbf{m}}(\mathbf{0}^{-\mathcal{I}} \odot \mathbf{x})^{\mathbf{m}} - \sum_{|\mathbf{m}| \leq D} \mathbb{1}(\prod_{i \in \mathcal{I}} m_i = 0) w_{\mathbf{m}}(\mathbf{0}^{-\mathcal{I}} \odot \mathbf{x})^{\mathbf{m}} \\
&= \sum_{|\mathbf{m}| \leq D} w_{\mathbf{m}}(\mathbf{0}^{-\mathcal{I}} \odot \mathbf{x})^{\mathbf{m}} - \sum_{|\mathbf{m}| \leq D} \left[ \sum_{\mathcal{I}' \subset \mathcal{I}} \mathbb{1}(\prod_{i \in \mathcal{I}'} m_i > 0 \text{ and } \sum_{i \in \{1,2,\dots,p\}/\mathcal{I}'} m_i = 0) \right] w_{\mathbf{m}}(\mathbf{0}^{-\mathcal{I}} \odot \mathbf{x})^{\mathbf{m}} \\
&= \sum_{|\mathbf{m}| \leq D} w_{\mathbf{m}}(\mathbf{0}^{-\mathcal{I}} \odot \mathbf{x})^{\mathbf{m}} - \sum_{|\mathbf{m}| \leq D} \sum_{\mathcal{I}' \subset \mathcal{I}} \mathbb{1}(\prod_{i \in \mathcal{I}'} m_i > 0) w_{\mathbf{m}}(\mathbf{0}^{-\mathcal{I}'} \odot \mathbf{0}^{-\mathcal{I}} \odot \mathbf{x})^{\mathbf{m}} \\
&= \sum_{|\mathbf{m}| \leq D} w_{\mathbf{m}}(\mathbf{0}^{-\mathcal{I}} \odot \mathbf{x})^{\mathbf{m}} - \sum_{|\mathbf{m}| \leq D} \sum_{\mathcal{I}' \subset \mathcal{I}} \mathbb{1}(\prod_{i \in \mathcal{I}'} m_i > 0) w_{\mathbf{m}}(\mathbf{0}^{-\mathcal{I}'} \odot \mathbf{x})^{\mathbf{m}} \\
&= g(\mathbf{0}^{-\mathcal{I}} \odot \mathbf{x}) - \sum_{\mathcal{I}' \subset \mathcal{I}} \phi_{\mathcal{I}'}(\mathbf{x}).
\end{aligned} \tag{12}$$

123 where  $\mathbf{0}^{-\mathcal{I}}$  is a  $d$ -length zero vector with ones indexed by  $\mathcal{I}$ ,  $\odot$  is the Hadamard product operator.  
124 Since we have  $\phi_{\emptyset}(\mathbf{x}) = g(\mathbf{0})$ , we can calculate any  $\phi_{\mathcal{I}}(\mathbf{x})$  by recursively calculating  $\phi_{\mathcal{I}'}(\mathbf{x})$  for  
125 every  $\mathcal{I}$ 's subset  $\mathcal{I}'$ .  $\square$

### 126 E Proof of Theorem 3

127 If  $\mathbf{x}$  is bounded and sampled from a distribution with upper-bounded probability density function,  
128 then for any ReLU activated plain DNN model  $f_{\text{DNN}}(\mathbf{x})$ , there exists a PAM with

$$Pr(f_{\text{PAM}}(\mathbf{x}) = f_{\text{DNN}}(\mathbf{x})) \rightarrow 1.$$

129 **Proof:** For any oblique tree's internal node  $n$  in the PAM, we set  $V(\mathbf{x}; \theta_n) \equiv 0$ . Then by setting  
130  $V(\mathbf{x}, \theta_G) \equiv 0$ , with the set of  $T$ 's leaf node  $\mathcal{N}_D$ , we have

$$\begin{aligned}
&f_{\text{PAM}}(\mathbf{x}) \\
&= \sum_{n' \in \mathcal{N}_D} a_{n'}(\mathbf{x}) V(\mathbf{x}; \theta_{n'}) \\
&= \sum_{n' \in \mathcal{N}_D} \prod_{i \in \mathcal{P}_{n'}^l} \max(\min(W_i \mathbf{x} + b_i + U_i, 2U_i), 0) \prod_{i \in \mathcal{P}_{n'}^r} \max(\min(-W_i \mathbf{x} - b_i + U_i, 2U_i), 0) V(\mathbf{x}; \theta_{n'}) \\
&= \sum_{n' \in \mathcal{N}_D} \left[ \prod_{i \in \mathcal{P}_{n'}^l} \mathbb{1}(W_i \mathbf{x} + b_i + U_i \geq 2U_i) \prod_{i \in \mathcal{P}_{n'}^r} \mathbb{1}(-W_i \mathbf{x} - b_i + U_i \geq 2U_i) \left[ \prod_{i \in \mathcal{P}_{n'}^l \cup \mathcal{P}_{n'}^r} 2U_i \right] V(\mathbf{x}; \theta_{n'}) \right. \\
&\quad \left. + (1 - \prod_{i \in \mathcal{P}_{n'}^l} \mathbb{1}(W_i \mathbf{x} + b_i + U_i \geq 2U_i) \prod_{i \in \mathcal{P}_{n'}^r} \mathbb{1}(-W_i \mathbf{x} - b_i + U_i \geq 2U_i)) a_{n'}(\mathbf{x}) V(\mathbf{x}; \theta_{n'}) \right].
\end{aligned} \tag{13}$$

131 Given  $\mathbf{x}$ , if there exists a  $T$ 's leaf node  $n'$  with

$$\prod_{i \in \mathcal{P}_{n'}^l} \mathbb{1}(W_i \mathbf{x} + b_i + U_i \geq 2U_i) \prod_{i \in \mathcal{P}_{n'}^r} \mathbb{1}(-W_i \mathbf{x} - b_i + U_i \geq 2U_i) = 1,$$

132 we have

$$\prod_{i \in \mathcal{P}_{n'}^l} \mathbb{1}(W_i \mathbf{x} + b_i \geq 0) \prod_{i \in \mathcal{P}_{n'}^r} \mathbb{1}(-W_i \mathbf{x} - b_i \geq 0) = 1, \tag{14}$$

133 Therefore, conditioned on the event

$$\mathcal{E} = \{\exists n' \in \mathcal{N}_D, \prod_{i \in \mathcal{P}_{n'}^l} \mathbb{1}(W_i \mathbf{x} + b_i + U_i \geq 2U_i) \prod_{i \in \mathcal{P}_{n'}^r} \mathbb{1}(-W_i \mathbf{x} - b_i + U_i \geq 2U_i) = 1\},$$

134 we have

$$\begin{aligned}
&f_{\text{PAM}}(\mathbf{x})|_{\mathcal{E}} \\
&= \sum_{n' \in \mathcal{N}_D} \prod_{i \in \mathcal{P}_{n'}^l} \mathbb{1}(W_i \mathbf{x} + b_i \geq 0) \prod_{i \in \mathcal{P}_{n'}^r} \mathbb{1}(-W_i \mathbf{x} - b_i \geq 0) \left[ \prod_{i \in \mathcal{P}_{n'}^l \cup \mathcal{P}_{n'}^r} 2U_i \right] V(\mathbf{x}; \theta_{n'}).
\end{aligned}$$

135 If we set  $W_i, b_i$  following the pipeline in Appendix B, we have  $\mathcal{N}_D = \mathcal{S}_\Delta$  (see definition in Eq. 3).  
 136 Then for each  $\Delta \in \mathcal{S}_\Delta$ , by setting

$$\left[ \prod_{i \in \mathcal{P}_{n'}^l \cup \mathcal{P}_{n'}^r} 2U_i \right] V(\mathbf{x}; \theta_{n'}) = W_\Delta \mathbf{x} + b_\Delta,$$

137 we have

$$f_{PAM}(\mathbf{x})|_{\mathcal{E}} = g^L(\mathbf{x}).$$

138 To bound the probability of  $Pr(f_{PAM}(\mathbf{x}) = f_{DNN}(\mathbf{x}))$ , we need to bound

$$\begin{aligned} & Pr(f_{PAM}(\mathbf{x}) = f_{DNN}(\mathbf{x})) \\ &= Pr(\exists n' \in \mathcal{N}_D, \prod_{i \in \mathcal{P}_{n'}^l} \mathbb{1}(W_i \mathbf{x} + b_i + U_i \geq 2U_i) \prod_{i \in \mathcal{P}_{n'}^r} \mathbb{1}(-W_i \mathbf{x} - b_i + U_i \geq 2U_i) = 1) \\ &= \sum_{n' \in \mathcal{N}_D} Pr\left(\prod_{i \in \mathcal{P}_{n'}^l} \mathbb{1}(W_i \mathbf{x} + b_i \geq U_i) \prod_{i \in \mathcal{P}_{n'}^r} \mathbb{1}(-W_i \mathbf{x} - b_i \geq U_i) = 1\right). \end{aligned} \tag{15}$$

139 According to Eq. 15,  $Pr(f_{PAM}(\mathbf{x}) = f_{DNN}(\mathbf{x}))$  increases as  $U_i$  decreases. When  $U_i = 0$ , it's  
 140 easy to get  $Pr(f_{PAM}(\mathbf{x}) = f_{DNN}(\mathbf{x})) = 1$ . Therefore, with  $U_i \rightarrow 0$ , we have  $Pr(f_{PAM}(\mathbf{x}) =$   
 141  $f_{DNN}(\mathbf{x})) \rightarrow 1$ . □

142

## 143 F Proof of Theorem 4

144 Before providing the proof of Theorem 4, we establish Lemma 1 as its foundation.

145 **Lemma 1** Under Assumption 1 in the main text, for any  $p, n > 0, \epsilon \in (0, 1)$ , and  $\mathbf{z} \in [0, 1]^{p+n-1}$ ,  
 146 if we have a function  $Q(\mathbf{z}) = z_1 z_2 \dots z_{p+n-1}$ , a function could be built on the basis of  $Q(\mathbf{z})$  which  
 147 can 1) approximates any function from  $F_{n,p}$  with an error bound  $\epsilon$  in the sense of  $L^\infty$  with at  
 148 most  $N_{Qp^n}(N+1)^p$  parameters, where  $N_Q$  is the number of trainable parameter in  $Q$ , and  
 149  $N = \lceil (\frac{n!}{2^p p^n} \frac{\epsilon}{2})^{-\frac{1}{n}} \rceil$ .

150 **Proof:** By replacing Ep. 18's nested  $Q$  with  $Q(\mathbf{z})$  in Theorem 1 in [1], we could get the conclusion.  
 151 □

152 **Theorem 4** For any  $p, n > 0$  and  $\epsilon \in (0, 1)$ , we have a PAM which can 1) approximates any function  
 153 from  $F_{n,p}$  with an error bound  $\epsilon$  in the sense of  $L^\infty$  with at most  $2p^n(N+1)^p(p+n-1)$  parameters,  
 154 where  $N = \lceil (\frac{n!}{2^p p^n} \frac{\epsilon}{2})^{-\frac{1}{n}} \rceil$ .

155 **Proof:** To prove Theorem 4, we first show that there exists a PAM  $f_{PAM}(\mathbf{z})$  outputting  
 156  $z_1 z_2 \dots z_{N_{p+n-1}}$ . In particular, we construct a  $(p+n)$ -depth oblique tree  $T$ . For any  $T$ 's internal node  
 157  $i$ , we set  $U_i = U_C$  as an extremely large hyper-parameter. For any depth  $d \in \{1, 2, \dots, p+n-1\}$ ,  
 158 all nodes with depth  $d$  share the same hyperplane with  $b_i = 0$  and

$$W_{i,j} = \begin{cases} 1, & j = d, \\ 0, & j \neq d, \end{cases}$$

159 for  $j \in \{1, 2, \dots, p+n-1\}$ , which means that each depth has 2 parameters, and the oblique tree has  
 160  $2(p+n-1)$  parameters.

161 According to the Assumption 1 in the main text,  $\mathbf{x}$  is bounded, which means that with  $U_C \geq 1$ , for  
 162 any leaf node  $l$ , we have

$$\begin{aligned} a_{\Delta_l}(\mathbf{z}) &= \prod_{n \in \mathcal{P}_l^l} \min \max((z_{d_l} + U_C, 0), 2U_C) \prod_{l \in \mathcal{P}_l^r} \min \max(-z_{d_l} + U_C, 0), 2U_C) \\ &= \prod_{l \in \mathcal{P}_l^l} z_{d_l} + U_C \prod_{l \in \mathcal{P}_l^r} -z_{d_l} + U_C, \end{aligned}$$

where  $d_n$  is the depth of node  $n$ . Then for any oblique tree's node  $n$ ,  $V(\mathbf{z}; \theta_n)$  is fixed following

$$V(\mathbf{z}; \theta_n) = \begin{cases} 0, & n \text{ is the internal node,} \\ \frac{(-1)^{|\mathcal{P}_n^r|}}{2^{p+n-1}}, & n \text{ is the leaf node,} \end{cases}$$

we have

$$f_{PAM}(\mathbf{z}) = z_1 z_2 \dots z_{N_{d+n-1}}.$$

With  $Q(\mathbf{z}) = f_{PAM}(\mathbf{z}) = z_1 z_2 \dots z_{N_{d+n-1}}$ , we get the conclusion following the Lemma 1.

□

## G Implementation Detail

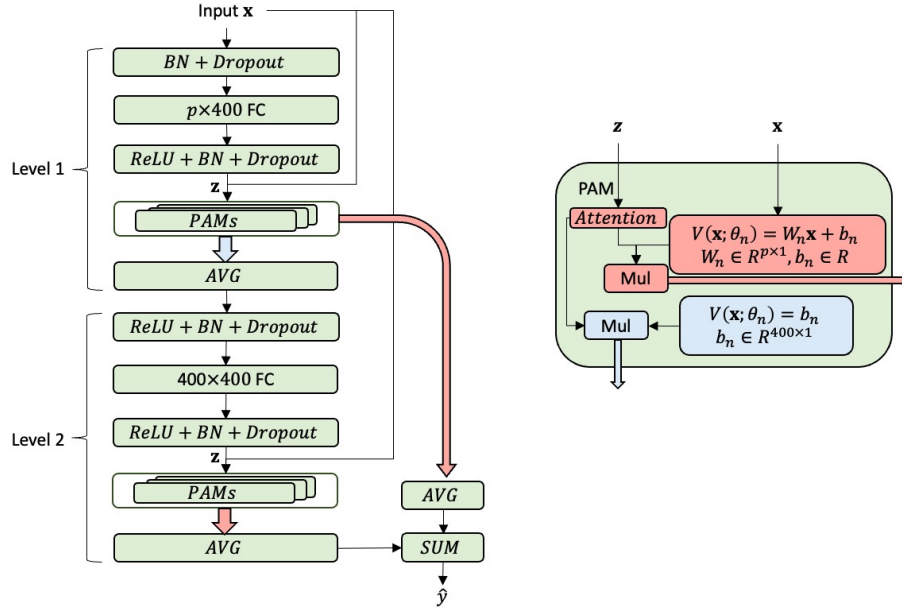

Figure 1: The structure of PAM-Net with 2 levels. BN: Batch Norm Layer; AVG: average; SUM: summation; Dropout: Dropout layer; Mul: matrix multiplication.

As shown in Fig. 1, we combine PAMs in a successive manner similar to cascade forest [2, 3, 4], and name the resultant network as the PAM-Net. In the PAM-Net, each PAM at a higher level calculates interactions among the outputs from its preceding level. Each level of PAM-Net maintains a forest, i.e., a set of PAMs of the same depth  $D$ , and outputs the average of these PAM outputs.

We follow the principle of Yan et al's work [5] to discuss the complexity of PAMs shown in Fig. 1. In Fig. 1, we consider two kinds of value functions, i.e.,  $V(x; \theta_n) = W_n x + b_n$ ,  $W_n \in \mathbb{R}^{p \times 1}$ ,  $b_n \in \mathbb{R}$ . Since a PAM with a  $D$ -depth oblique tree has  $2^{D-1}$  value functions (1 global value function following Eq. 3 in the main text and  $2^{D-1} - 1$  value functions for polyhedrons following Remark 1 in the main text), and the dimension of PAM's input is  $p$  according to Eq. 4 in the main text, the memory complexity of these two kinds of value functions is  $\mathcal{O}(2^D p)$ . In addition to the value function, a  $D$ -depth oblique tree has  $2^{D-1} - 1$  hyperplanes with  $\mathcal{O}(2^{D-1} p)$  trainable parameters. Therefore, the total memory complexity of PAM is  $\mathcal{O}(2^D p)$ . As for the time complexity, PAM need to 1) calculate the attention score following Eq. 9 in the main text, 2) generate the corresponding values via value functions mentioned above, and 3) output  $f_{PAM}$  by multiplying the attention with values following Eq. 8 in the main text. As shown in Table 1, the TIME complexity of PAM is  $\mathcal{O}(2^{D-1}(2p + D))$ .

For the classification task (Criteo and Avazu dataset), we compress the high dimensional inputs into numerical vectors of a fixed length following the protocol of BARS [6]. For each one-hot encoded or continuous feature, denoted by  $x_i^{raw}$ , a numerical vector with a fixed length of 10 can be obtained by  $\mathbf{W}_i x_i^{raw}$  where  $\mathbf{W}_i \in \mathbb{R}^{10 \times |x_i^{raw}|}$  is a trainable embedding matrix. Therefore, for Criteo and Avazu

Table 1: The computation complexity of PAMs in Fig. 1.

| Value Function | Step 1                        | Step 2                  | Step 3                  |
|----------------|-------------------------------|-------------------------|-------------------------|
| $W_n x + b_n$  | $\mathcal{O}(2^{D-1}(p + D))$ | $\mathcal{O}(2^{D-1}p)$ | $\mathcal{O}(2^{D-1})$  |
| $b_n$          | $\mathcal{O}(2^{D-1}(p + D))$ | -                       | $\mathcal{O}(2^{D-1}p)$ |

187 datasets, the input of PAMs in the first level of PAM-Net has 390 and 210 elements, respectively.  
 188 While for the regression task (UK Biobank dataset), we directly use the raw data as the input of the  
 189 first level, which contains 139 elements.

190 In PAM-Net, we set the number of levels to 2. A grid search is performed over different configurations  
 191 of tree depth, i.e.  $D = \{4, 5, 6, 7, 8\}$ , where the numbers of PAM trees in each level are set to 96,  
 192 48, 24, 12, and 6 for the Criteo and Avazu datasets, and 24, 12, 6, 3, and 1 for the UK Biobank  
 193 dataset, respectively. We conduct grid searches on the dropout rate over  $\{0, 0.1, 0.2\}$  and the initial  
 194 value of  $U_i$  over  $\{1, 1.5, 2, 2.5, 3\}$ . Note that BN and dropout layers were also used in all baseline  
 195 algorithms and the dropout rate was well-tuned. The Adam optimizer is employed to minimize  
 196 the loss function using a learning rate of 0.001 with a mini-batch size of 4,096 (Criteo and Avazu  
 197 datasets) or 1,024 (UK Biobank dataset). To avoid overfitting, we perform early-stopping according  
 198 to the AUC calculated on the validation set. All algorithms are implemented in PyTorch and tested  
 199 on servers equipped with Intel Xeon Gold 6150 2.7GHz CPU, 192GB RAM, and an NVIDIA Tesla  
 200 V100 GPU.

## 201 References

- 202 [1] Feng-Lei Fan, Hang-Cheng Dong, Zhongming Wu, Lecheng Ruan, Tiejong Zeng, Yiming  
 203 Cui, and Jing-Xiao Liao. One neuron saved is one neuron earned: On parametric efficiency of  
 204 quadratic networks. *arXiv preprint arXiv:2303.06316*, 2023.
- 205 [2] Neeraj Dhungel, Gustavo Carneiro, and Andrew P Bradley. Automated mass detection in  
 206 mammograms using cascaded deep learning and random forests. In *2015 international conference*  
 207 *on digital image computing: techniques and applications (DICTA)*, pages 1–8. IEEE, 2015.
- 208 [3] Gaoxiang Chen, Qun Li, Fuqian Shi, Islem Rekik, and Zhifang Pan. Rfdcr: Automated brain  
 209 lesion segmentation using cascaded random forests with dense conditional random fields. *Neu-*  
 210 *rolImage*, 211:116620, 2020.
- 211 [4] Xiongfei Tian, Ling Shen, Zhenwu Wang, Liqian Zhou, and Lihong Peng. A novel lncrna–protein  
 212 interaction prediction method based on deep forest with cascade forest structure. *Scientific*  
 213 *Reports*, 11(1):1–15, 2021.
- 214 [5] Bencheng Yan, Pengjie Wang, Kai Zhang, Feng Li, Hongbo Deng, Jian Xu, and Bo Zheng. Apg:  
 215 Adaptive parameter generation network for click-through rate prediction. *Advances in Neural*  
 216 *Information Processing Systems*, 35:24740–24752, 2022.
- 217 [6] Jieming Zhu, Quanyu Dai, Liangcai Su, Rong Ma, Jinyang Liu, Guohao Cai, Xi Xiao, and Rui  
 218 Zhang. Bars: Towards open benchmarking for recommender systems. In *Proceedings of the 45th*  
 219 *International ACM SIGIR Conference on Research and Development in Information Retrieval*,  
 220 SIGIR ’22, page 2912–2923, New York, NY, USA, 2022. Association for Computing Machinery.
